# Supplementary material for: Teff Type-I Sourdough to Produce Gluten-Free Muffin
Source: MDPI journal article supplement (doi:10.3390/microorganisms8081149), 2020-07-29
Supplement: s1 [file s1]

**Table S1.** Ingredients used for the manufacture of the teff muffins: M<sub>5%</sub>, muffin containing 5% (wt/wt) type-I sourdough; M<sub>10%</sub>, muffin containing 10% (wt/wt) type-I sourdough; M<sub>15%</sub>, muffin containing 15% (wt/wt) type-I sourdough; M<sub>CT</sub>, muffin made without type-I sourdough.

| <b>Ingredient</b> | <b>M<sub>5%</sub></b> | <b>M<sub>10%</sub></b> | <b>M<sub>15%</sub></b> | <b>M<sub>CT</sub></b> |
|-------------------|-----------------------|------------------------|------------------------|-----------------------|
| Teff flour        | 29.7 ± 0.4            | 27 ± 2                 | 24.2 ± 0.2             | 32.44 ± 0.3           |
| Sugar             | 17.8 ± 0.3            | 17.8 ± 0.3             | 17.8 ± 0.4             | 17.84 ± 0.3           |
| Leavening agent*  | 1.1 ± 0.2             | 1.1 ± 0.3              | 1.1 ± 0.3              | 1.07 ± 0.2            |
| Milk Powder       | 2.3 ± 0.4             | 2.3 ± 0.2              | 2.3 ± 0.2              | 2.27 ± 0.3            |
| Tap Water         | 11.7 ± 0.2            | 9.4 ± 0.1              | 7.2 ± 0.2              | 13.95 ± 0.3           |
| Oil               | 16.2 ± 0.3            | 16.2 ± 0.4             | 16.2 ± 0.3             | 16.2 ± 0.3            |
| Eggs              | 16.2 ± 0.3            | 16.2 ± 0.3             | 16.2 ± 0.4             | 16.2 ± 0.4            |
| Type-I Sourdough  | 5 ± 3                 | 10 ± 2                 | 15 ± 2                 | -                     |

\* Leavening agent, chemical leavening agent (PANEANGELI, Cameo s.p.a., Desenzano del Garda, Italy)

**Table S2.** List of the attributes used for the sensory analysis of the teff muffins.

| <b>Attributes</b>  |                     |                       |                          |
|--------------------|---------------------|-----------------------|--------------------------|
| <b><i>Odor</i></b> | <b><i>Taste</i></b> | <b><i>Texture</i></b> | <b><i>Appearance</i></b> |
| Eggs               | Sweet               | Firmness              | Darkening                |
| Burned             | Sour                | Crispness             | Homogeneity              |
| Damp               | Fibres              | Porosity              | Porosity                 |
| Caramel            | Yeast               | Oily                  | Firmness                 |
| Vanilla            | Bran                | Chewiness             | Graininess               |
| Leafy              | Oil                 | Graininess            | Green (external)         |
| Legumes            | Vanilla             | Springiness           | Yellow (external)        |
| Sponge cake        | Tannic              | Hardness              | Green (internal)         |
| Baking powder      | Butter              | Breaking strength     | Yellow (internal)        |
| Citrus             | Damp                | Gummy                 | Golden surface           |
| Yogurt             | Short pastry        | Sandy                 |                          |
| Lactic             | Sandy               | Floury                |                          |
|                    | Spicy               |                       |                          |
|                    | Salty               |                       |                          |
|                    | Smoked              |                       |                          |
|                    | Dry                 |                       |                          |
|                    | Apple               |                       |                          |

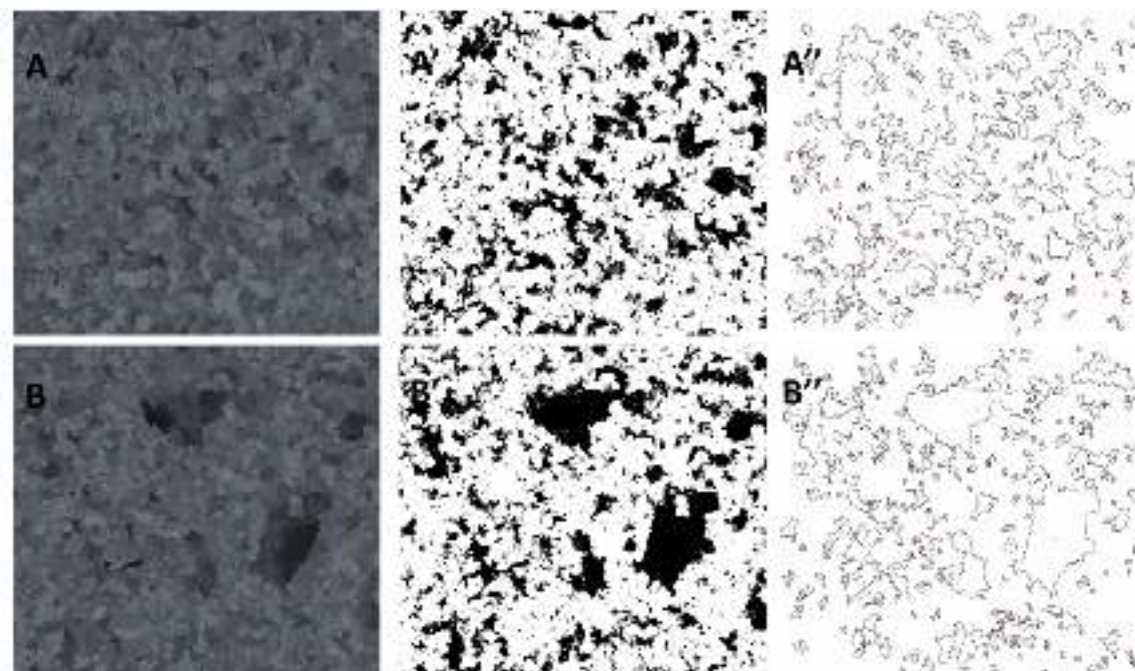

**Figure S1.** Crumb image analysis of the teff muffins obtained by ImageJ software: M<sub>cr</sub>, muffin made without type-I sourdough (Panel A); M<sub>15%</sub>, muffin containing 15% (wt/wt) type-I sourdough (Panel B). Threshold (A' and B') and drawing (A'' and B'') are also reported.

**Table S3.** Color parameters evaluation in crust and crumb of the teff muffins :M<sub>5%</sub>, muffin containing 5% (wt/wt) type-I sourdough; M<sub>10%</sub>, muffin containing 10% (wt/wt) type-I sourdough; M<sub>15%</sub>, muffin containing 15% (wt/wt) type-I sourdough; M<sub>cr</sub>, muffin made without type-I sourdough.

| Samples          | crust               |                  |                      | crumb            |                 |                     |
|------------------|---------------------|------------------|----------------------|------------------|-----------------|---------------------|
|                  | $L^*$               | $a^*$            | $b^*$                | $L^*$            | $a^*$           | $b^*$               |
| M <sub>5%</sub>  | $46.9 \pm 3.7^{ab}$ | $10.1 \pm 2.1^a$ | $29.5 \pm 4.1^{a,b}$ | $58.1 \pm 1.5^a$ | $4.5 \pm 0.5^a$ | $27.7 \pm 0.3^{bc}$ |
| M <sub>10%</sub> | $46.8 \pm 2.9^{ab}$ | $7.7 \pm 1.5^a$  | $23.9 \pm 2.9^{a,b}$ | $59.7 \pm 0.8^a$ | $4.4 \pm 0.2^a$ | $29.1 \pm 0.5^{ab}$ |
| M <sub>15%</sub> | $40.8 \pm 2.4^b$    | $8.1 \pm 0.8^a$  | $24.2 \pm 1.6^b$     | $59.6 \pm 1.2^a$ | $4.5 \pm 0.3^a$ | $27.3 \pm 0.4^c$    |

|     |                         |                        |                         |                         |                        |                         |
|-----|-------------------------|------------------------|-------------------------|-------------------------|------------------------|-------------------------|
| MCT | 51.2 ± 3.9 <sup>a</sup> | 7.5 ± 1.7 <sup>a</sup> | 28.6 ± 1.6 <sup>a</sup> | 56.6 ± 2.3 <sup>a</sup> | 4.8 ± 0.5 <sup>a</sup> | 30.1 ± 0.7 <sup>a</sup> |
|-----|-------------------------|------------------------|-------------------------|-------------------------|------------------------|-------------------------|

---

Data are the means of three independent batches analysis ± standard deviations (n = 3).<sup>a-c</sup> Values in the same column with different superscript letters differ significantly (p<0.05).
